# Supplementary material for: EBV-positive intravascular large B-cell lymphoma of the liver: a case report and literature review
Source: Diagn Pathol. 2020 Jun 8;15:72. doi: 10.1186/s13000-020-00989-x (PMC7282072; doi:10.1186/s13000-020-00989-x)
Supplement: Supplementary file 1 — Additional file 1: Table S2. Clinicopathological features of previously reported and present cases of IVLBCL diagnosed by liver biopsy. [file 13000_2020_989_MOESM1_ESM.xls]

## Sheet: Sheet1
Table 2 Clinicopathological features of previously reported and present cases of IVLBCL diagnosed by liver biopsy
Author	Age (y) /Sex	Clinical symptoms	laboratory findings	Imaging features	BM	Immunohistochemical features					Treatment	Outcome (months)
						CD20	PAX-5	CD3	CD5	CD10
Kim (10)	71/M	Fever	Thrombocytopenia, anemia, and high levels of LDH, ALT,AST, and ferritin.	Hepatosplenomegaly	–	+	NR	–	–	NR	ND	DOD
Bae (11)	58/M	Fever and dyspnea	Anemia and elevated levels of serum LDH, ALT and AST.	Multiple mass-like lesions in the live	+	+	NR	NR	NR	NR	R-CHOP	AWD (17)
Sekiguchi (12)	72/M	Fever	Thrombocytopenia and elevated CRP, ferritin and sIL-2R.	Hepatosplenomegaly and pleural effusion	–	+	NR	–	–	NR	R-CHOP	AWD
Makino (13)	54/M	Fever	Elevated levels of serum LDH, ferritin and sIL-2R.	NR	–	+	NR	NR	–	NR	R-CHOP	DOD (1)
Rashidi (14)	59/M	NR	Elevated levels of LDH, ALT and AST.	Hepatomegaly	+	+	+	NR	+	+	NR	NR
Fung (15)	51/M	Fatigue, night sweats and weight loss	Thrombocytopenia, anemia, and elevated levels of LDH, AST, ALT and ferritin.	Hepatosplenomegaly	–	+	NR	–	–	NR	R-CHOP	AWD (12)
Aoki (16)	79/M	Dizziness	Anemia and thrombocytopenia.	Hepatosplenomegaly	–	+	NR	–	+	NR	ND	DOD
Hsieh (17)	42/M	Weakness	Anemia and elevated level of serum LDH.	Hepatosplenomegaly and pleural effusion	+	+	NR	NR	–	–	CHOP	AWD (148)
Roshal (18)	51/M	None	NR	Adrenal masses	–	+	+	NR	–	–	Rituximab	DOD (3)
Shiraki (19)	67/F	Fever and fatigue	Elevated levels of serum LDH and AST.	Hepatosplenomegaly	–	+	NR	NR	NR	NR	CHOP	AWD
Tokura (20)	57/M	Fever	Thrombocytopenia, hypoalbuminemia, anemia, and high levels of CRP, LDH, ferritin and sIL-2R.	Splenomegaly	+	+	NR	–	+	–	CHOP	DOD (11)
Abe (21)	72/F	Fatigue and loss of appetite	Elevated levels of sIL-2R.	Liver tumors and a spinal cord tumor	–	+	NR	–	NR	NR	R-CHOP	AWD (7)
Present case	65/M	Fever	Thrombocytopenia, hypoalbuminemia, anemia, and high levels of CRP, LDH, ferritin, ALT and AST.	Hepatosplenomegaly and a low density lesion in the liver	–	+	+	–	+	–	ND	DOD (1)
M male, F female, NR not reported, LDH serum lactate dehydrogenase, ALT alanine aminotransferase, AST aspartate aminotransferase, CRP C-reactive protein, sIL-2R soluble interleukin 2 receptor, BM bone marrow involvement, PAX-5 Paired box protein 5, ND not done, CHOP cyclophosphamide, doxorubicin, vincristine, and prednisone, R-CHOP rituximab plus CHOP, DOD died of disease, AWD alive with disease
